# Supplementary material for: Steric effects in the hydrogen evolution reaction based on the TMX4 active center: Fe–BHT as a case study
Source: Royal Society of Chemistry journal article supplement (doi:10.1039/d1cp04046d), 2021-01-01
Supplement: d1cp04046d1.pdf [file d1cp04046d1.pdf]

**Steric Effects in Hydrogen Evolution Reaction Based on  $\text{TMX}_4$  Active Center:**

**Fe–BHT as a Case Study**

Zebin Ren, Shuhua Wang, Haona Zhang, Baibiao Huang, Ying Dai,<sup>\*</sup> and Wei Wei<sup>\*</sup>

*School of Physics, State Key Laboratory of Crystal Materials, Shandong University,*

*Jinan 250100, China*

<sup>\*</sup> Corresponding authors: [daiy60@sdu.edu.cn](mailto:daiy60@sdu.edu.cn) (Y. Dai), [weiw@sdu.edu.cn](mailto:weiw@sdu.edu.cn) (W. Wei)

**Table S1.** Lattice constant, cohesive energy ( $E_{\text{coh}}$ ), area of the optimized unit cell ( $S_0$ ),  $\partial^2 E_{\text{total}}/\partial \varepsilon^2$  and band gap of TM–BHTs considered in this work.

| TM–BHT | Lattice<br>constant (Å) | $E_{\text{coh}}$<br>(eV/atom) | $S_0$ (Å <sup>2</sup> ) | $\partial^2 E_{\text{total}}/\partial \varepsilon^2$ | Band gaps<br>(eV) |
|--------|-------------------------|-------------------------------|-------------------------|------------------------------------------------------|-------------------|
| Sc–BHT | 9.37                    | 5.67                          | 76.03                   | 1168.27                                              | 0                 |
| Ti–BHT | 9.09                    | 5.47                          | 71.56                   | 1106.37                                              | 0                 |
| V–BHT  | 8.85                    | 5.39                          | 67.83                   | 1088.45                                              | 0                 |
| Cr–BHT | 8.67                    | 5.35                          | 65.10                   | 945.87                                               | 0                 |
| Mn–BHT | 8.55                    | 5.39                          | 63.31                   | 781.41                                               | 0.03              |
| Fe–BHT | 8.46                    | 5.41                          | 61.98                   | 862.95                                               | 0                 |
| Co–BHT | 8.44                    | 5.36                          | 61.69                   | 794.372                                              | 0                 |
| Ni–BHT | 8.56                    | 5.36                          | 63.46                   | 838.17                                               | 0                 |
| Cu–BHT | 8.75                    | 5.32                          | 66.31                   | 834.412                                              | 0                 |

**Table S2.** Gibbs free energy change ( $\Delta G_{H^*}$ ) of TM-BHTs for hydrogen adsorption on different active sites (TM and S). “/” means that the adsorbed hydrogen moves to TM sites after structural optimization. The unit is eV.

| TM-BHT | $\Delta G_{H^*}$ -TM | $\Delta G_{H^*}$ -S |
|--------|----------------------|---------------------|
| Sc-BHT | -0.42                | /                   |
| Ti-BHT | -0.38                | /                   |
| V-BHT  | 1.36                 | /                   |
| Cr-BHT | 0.29                 | /                   |
| Mn-BHT | 0.75                 | /                   |
| Fe-BHT | 0.09                 | 1.22                |
| Co-BHT | -0.45                | 0.14                |
| Ni-BHT | -1.21                | -0.85               |
| Cu-BHT | 1.16                 | 0.49                |

**Table S3.**  $\Delta G_{H^*}$ ,  $\Delta \varepsilon_d^{\uparrow\downarrow} z^2$  for different active center  $\text{FeS}_{4-x}\text{N}_x$ . The unit is eV.

| $\text{FeS}_{4-x}\text{N}_x$ | $\Delta G_{H^*}$ | $\varepsilon_{unoccupied}$ | $\varepsilon_{occupied}$ | $\Delta \varepsilon_d^{\uparrow\downarrow} z^2$ |
|------------------------------|------------------|----------------------------|--------------------------|-------------------------------------------------|
| $\text{FeS}_4$               | 0.09             | 0.70                       | -2.86                    | 3.56                                            |
| $\text{FeS}_3\text{N}$       | 0.14             | 0.75                       | -2.86                    | 3.61                                            |
| $\text{FeS}_2\text{N}_2$     | 0.26             | 0.81                       | -2.93                    | 3.74                                            |
| $\text{FeSN}_3$              | 0.39             | 0.80                       | -3.02                    | 3.82                                            |
| $\text{FeN}_4$               | 0.64             | 0.94                       | -3.54                    | 4.48                                            |

**Table S4.**  $\Delta G_{\text{H}^*}$  and  $\Delta \varepsilon_d^{\uparrow\downarrow} z^2$  for Fe–BHT under strain. The unit is eV.

| strain | $\Delta G_{\text{H}^*}$ | $\varepsilon_{unoccupied}$ | $\varepsilon_{occupied}$ | $\Delta \varepsilon_d^{\uparrow\downarrow} z^2$ |
|--------|-------------------------|----------------------------|--------------------------|-------------------------------------------------|
| 4%     | 0.46                    | 0.85                       | −3.14                    | 3.99                                            |
| 3%     | 0.36                    | 0.86                       | −3.06                    | 3.92                                            |
| 2%     | 0.22                    | 0.82                       | −2.93                    | 3.75                                            |
| 1%     | 0.17                    | 0.74                       | −2.93                    | 3.67                                            |
| 0%     | 0.09                    | 0.70                       | −2.86                    | 3.56                                            |
| −1%    | 0.04                    | 0.66                       | −2.87                    | 3.53                                            |
| −2%    | 0.03                    | 0.62                       | −2.86                    | 3.48                                            |

**Table S5.**  $\Delta G_{\text{H}^*}$  of  $\text{TiS}_{4-x}\text{N}_x$  and strained Ti–BHT. The unit is eV.

| $\text{TiS}_{4-x}\text{N}_x$ | $\Delta G_{\text{H}^*}$ | strain | $\Delta G_{\text{H}^*}$ |
|------------------------------|-------------------------|--------|-------------------------|
| $\text{TiS}_4$               | −0.38                   | 0%     | −0.38                   |
| $\text{TiS}_3\text{N}$       | −0.31                   | 1%     | −0.13                   |
| $\text{TiS}_2\text{N}_2$     | −0.26                   | 2%     | 0.28                    |
| $\text{TiSN}_3$              | −0.16                   | 3%     | 0.30                    |
| $\text{TiN}_4$               | −0.05                   | 4%     | 0.45                    |

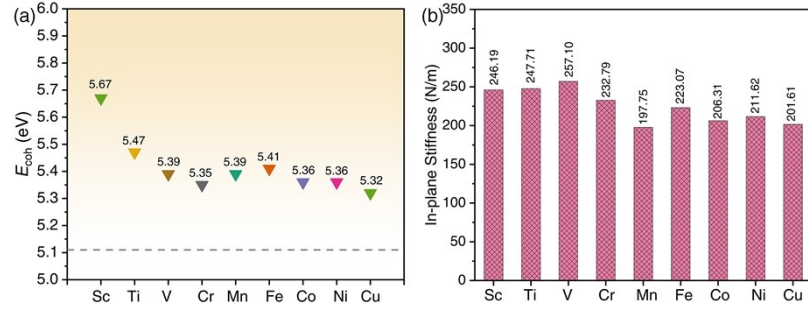

**Fig. S1** (a) Cohesive energy ( $E_{\text{coh}}$ ) of TM-BHTs of consideration, the horizontal dashed line represents the previous value of Cu-BHT of 5.11 eV/atom. (b) In-plane stiffness of TM-BHTs of interest in this work.

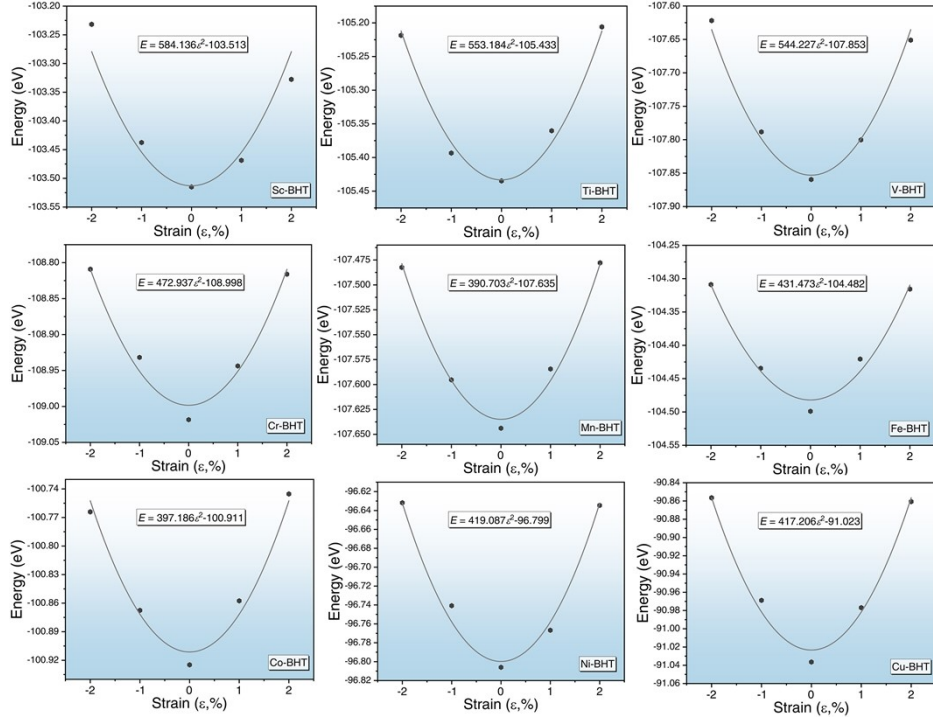

**Fig. S2** Relationship between the total energy and strain along  $b$  axis.

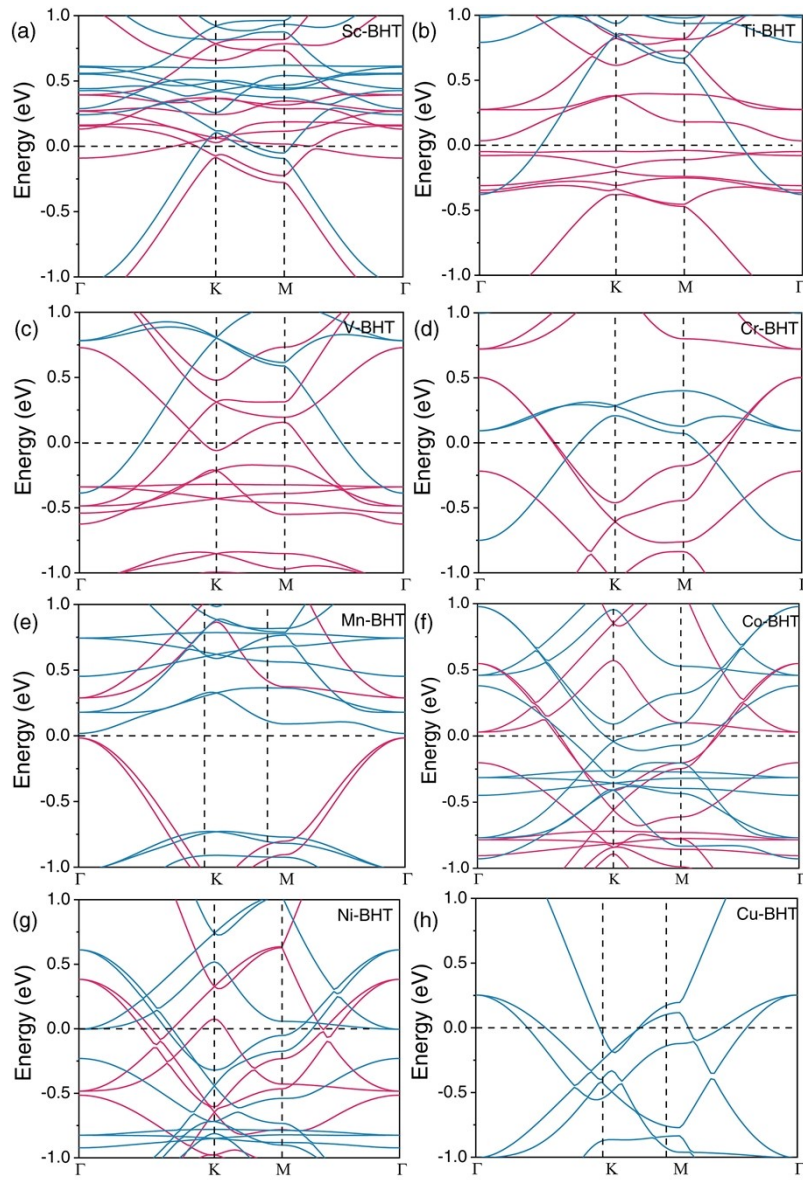

**Fig. S3** Band structures of 2D TM-BHTs studied in this work, the Fermi level is set to zero.

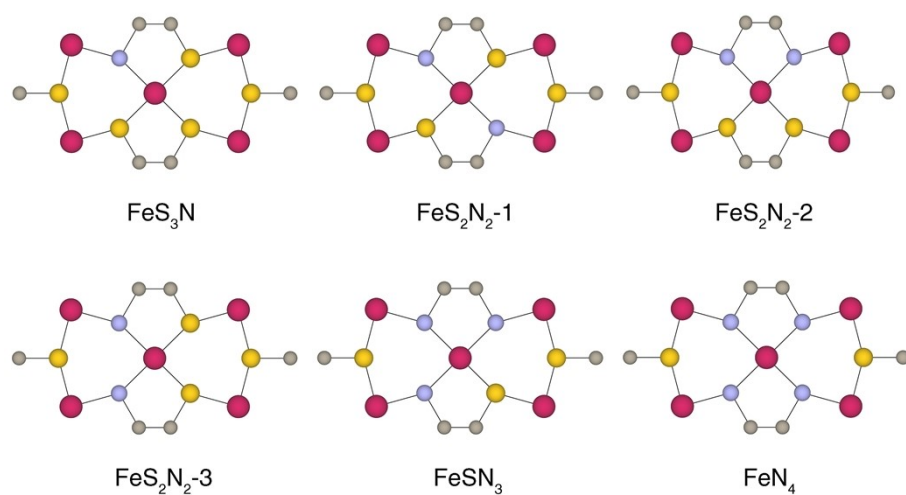

**Fig. S4** Local structure of  $\text{FeS}_3\text{N}$ ,  $\text{FeS}_2\text{N}_2\text{-1}$ ,  $\text{FeS}_2\text{N}_2\text{-2}$ ,  $\text{FeS}_2\text{N}_2\text{-3}$ ,  $\text{FeSN}_3$  and  $\text{FeN}_4$

active centers in Fe-BHT.

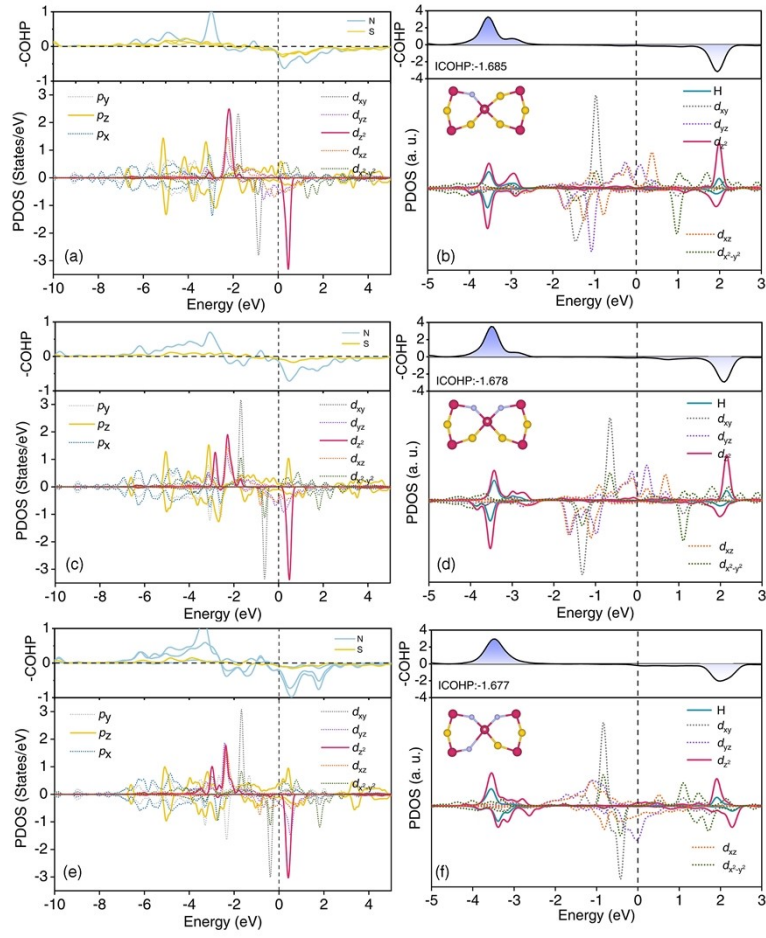

**Fig. S5** Projected density of states (PDOS) on S  $p$  and Fe  $d$  orbitals for (a) FeS<sub>3</sub>N, (c) FeS<sub>2</sub>N<sub>2</sub> and (e) FeSN<sub>3</sub>. Crystal orbital Hamilton population (COHP), integrated COHP (ICOHP), and PDOS for H  $s$  and Fe  $d$  orbitals for (b) FeS<sub>3</sub>N, (d) FeS<sub>2</sub>N<sub>2</sub> and (f) FeSN<sub>3</sub>. Insets are hydrogen adsorption configurations. The vertical dashed line represents the Fermi level.

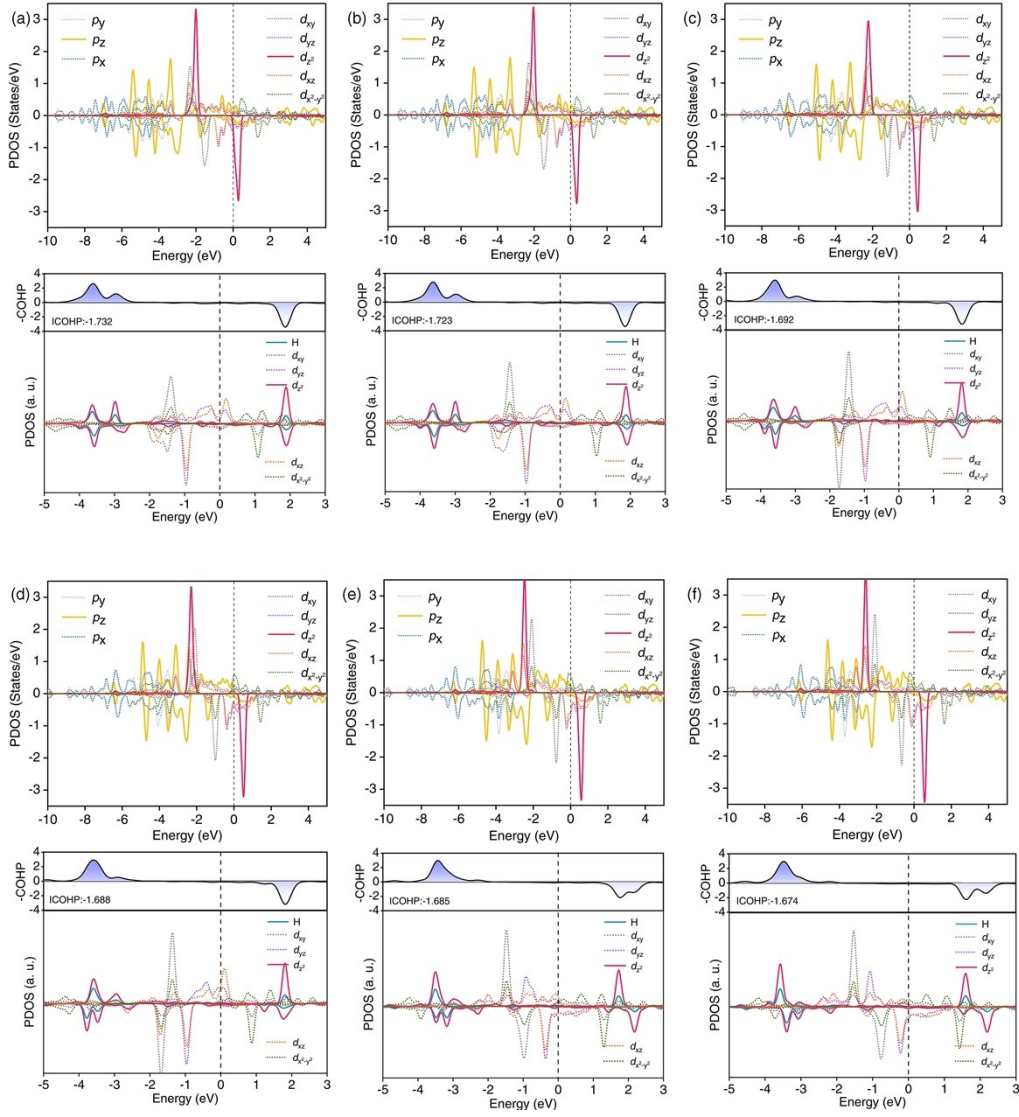

**Fig. S6** Projected density of states (PDOS), crystal orbital Hamilton population (COHP) and integrated COHP (ICOHP) of Fe-BHT under strain, (a)  $-2\%$ , (b)  $-1\%$ , (c)  $1\%$ , (d)  $2\%$ , (e)  $3\%$  and (f)  $4\%$ . Upper: PDOS on S  $p$  and Fe  $d$  orbitals. Bottom: COHP, ICOHP and PDOS on H  $s$  and Fe  $d$  orbitals. The vertical dashed line represents the Fermi level.

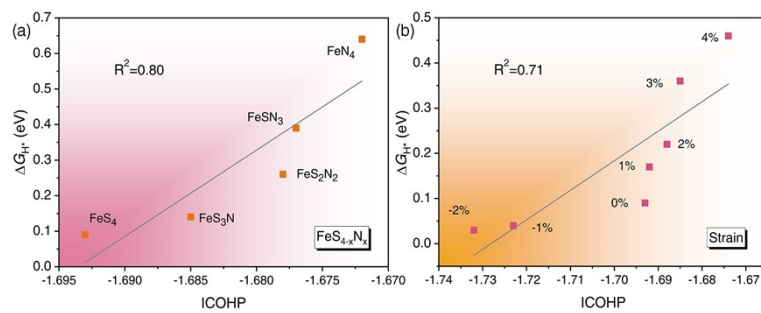

**Fig. S7** Relationship between  $\Delta G_{H^*}$  and ICOHP for (a)  $\text{FeS}_{4-x}\text{N}_x$  and (b) strained Fe–BHT.

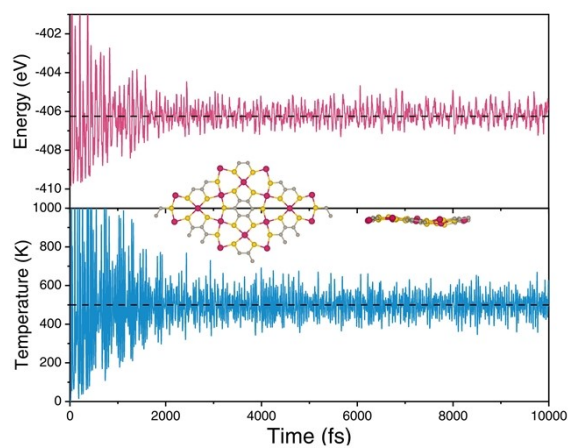

**Fig. S8** Variation of energy and temperature versus the AIMD simulation time for Fe–BHT. Insets denote the top and side views of Fe–BHT after AIMD simulation lasting for 10 ps with a time step of 1 fs at  $T = 500$  K.
